# Supplementary material for: Burden of anemia and its underlying causes in 204 countries and territories, 1990–2019: results from the Global Burden of Disease Study 2019
Source: PubMed Central journal article supplement (PMC8567696; doi:10.1186/s13045-021-01202-2), 2021-11-04

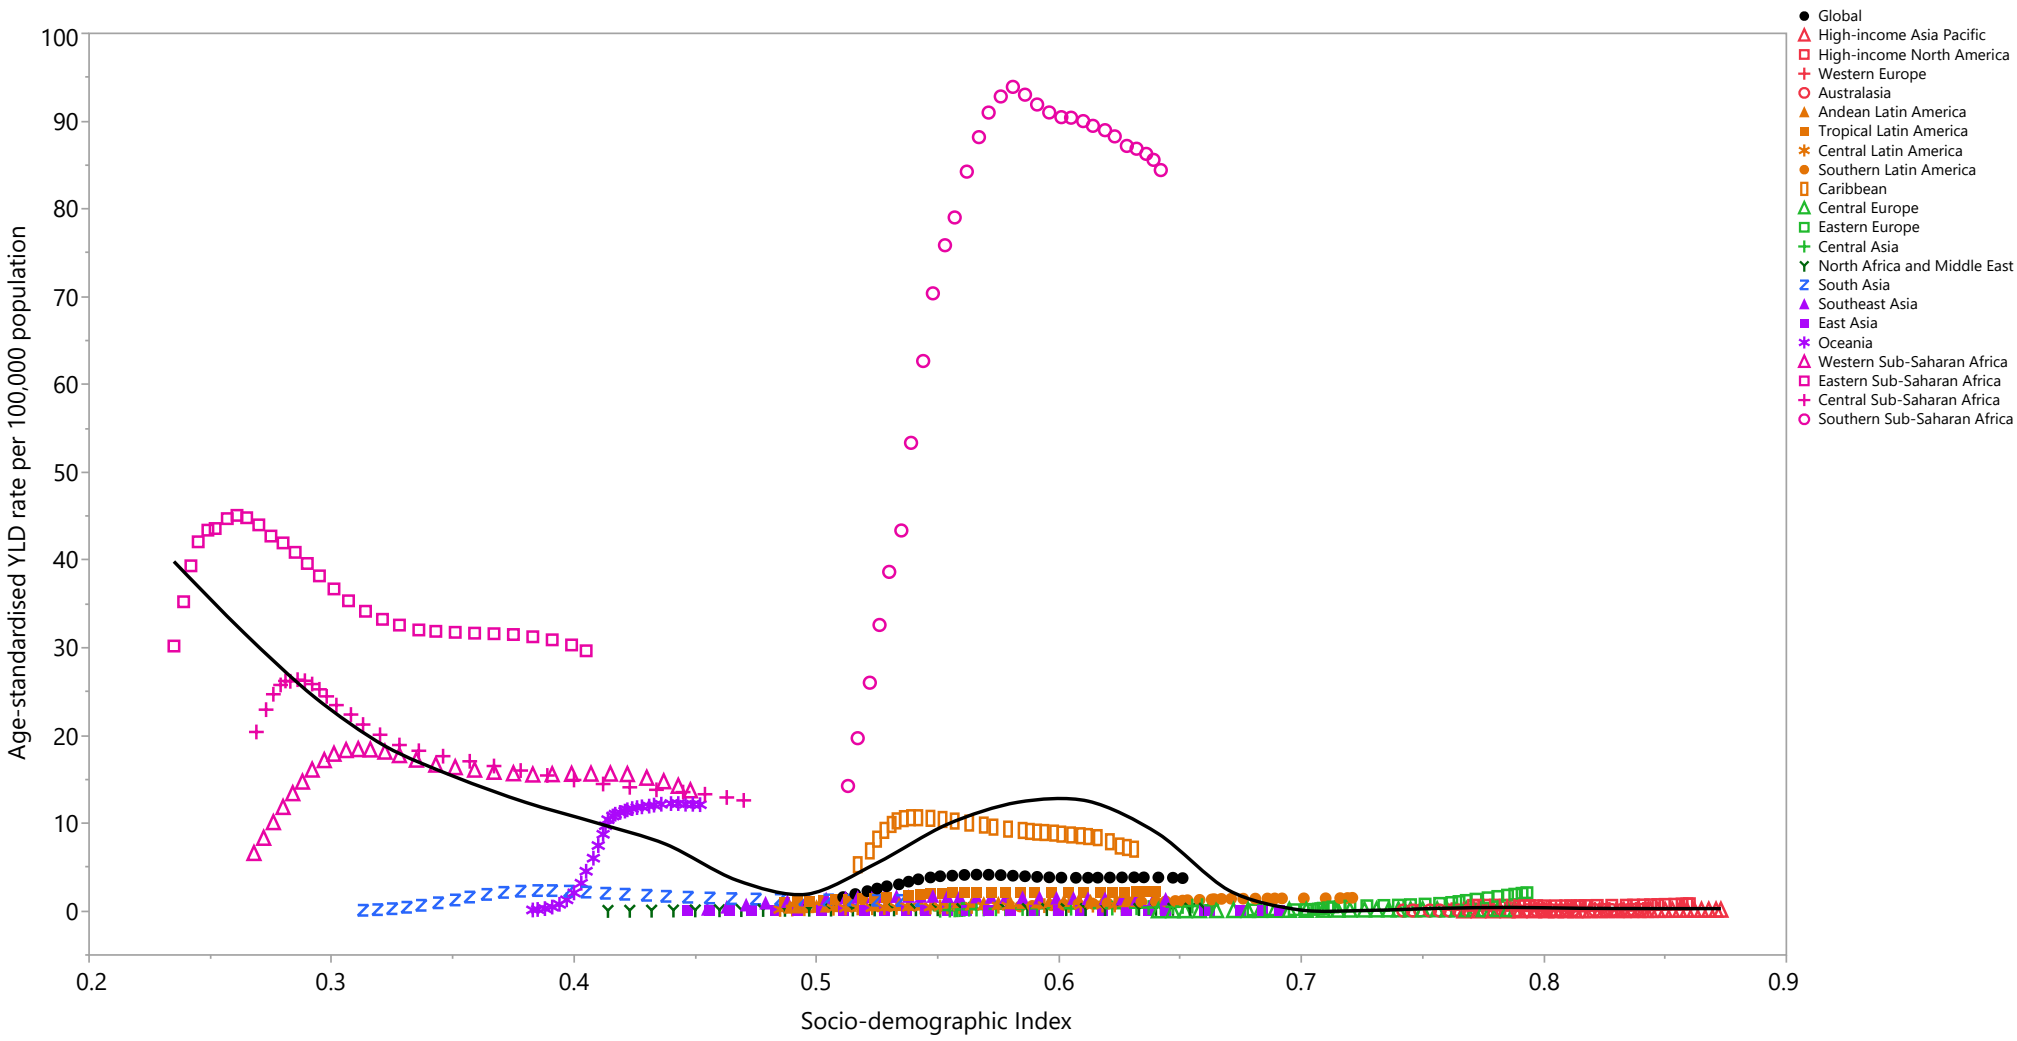

Supplement: 13045_2021_1202_MOESM17_ESM.pdf [file 13045_2021_1202_MOESM17_ESM.pdf]
